# Supplementary material
Source: MDPI journal article supplement (https://www.mdpi.com/1999-4907/12/3/375)
Supplement: s1 [file s1]

## Supplementary Materials

**Table S1.** Bioclimatic variables

| Variable name                                              | Unit    |
|------------------------------------------------------------|---------|
| Annual Mean Temperature                                    | °C * 10 |
| Mean Diurnal Range (Mean of monthly (max temp - min temp)) | °C * 10 |
| Isothermality (BIO2/BIO7) (* 100)                          | -       |
| Temperature Seasonality (standard deviation *100)          | °C * 10 |
| Max Temperature of Warmest Month                           | °C * 10 |
| Min Temperature of Coldest Month                           | °C * 10 |
| Temperature Annual Range (BIO5-BIO6)                       | °C * 10 |
| Mean Temperature of Wettest Quarter                        | °C * 10 |
| Mean Temperature of Driest Quarter                         | °C * 10 |
| Mean Temperature of Warmest Quarter                        | °C * 10 |
| Mean Temperature of Coldest Quarter                        | °C * 10 |
| Annual Precipitation                                       | mm      |
| Precipitation of Wettest Month                             | mm      |
| Precipitation of Driest Month                              | mm      |
| Precipitation Seasonality (Coefficient of Variation)       | mm      |
| Precipitation of Wettest Quarter                           | mm      |
| Precipitation of Driest Quarter                            | mm      |
| Precipitation of Warmest Quarter                           | mm      |
| Precipitation of Coldest Quarter                           | mm      |

**Table S2.** Envirem variables

| Variable name            | Brief description                                                                                                                                                                        | Unit       |
|--------------------------|------------------------------------------------------------------------------------------------------------------------------------------------------------------------------------------|------------|
| annualPET                | annual potential evapotranspiration: a measure of the ability of the atmosphere to remove water through evapotranspiration processes, given unlimited moisture                           | mm / year  |
| aridityIndexThornthwaite | Thornthwaite aridity index: Index of the degree of water deficit below water need                                                                                                        | -          |
| climaticMoistureIndex    | a metric of relative wetness and aridity                                                                                                                                                 | -          |
| continentality           | average temp. of warmest month - average temp. of coldest month                                                                                                                          | °C         |
| embergerQ                | Emberger's pluviothermic quotient: a metric that was designed to differentiate among Mediterranean type climates                                                                         | -          |
| growingDegDays0          | sum of mean monthly temperature for months with mean temperature greater than 0°C multiplied by number of days                                                                           | -          |
| growingDegDays5          | sum of mean monthly temperature for months with mean temperature greater than 5°C multiplied by number of days                                                                           | -          |
| maxTempColdestMonth      | max. temp. of the coldest month                                                                                                                                                          | °C * 10    |
| minTempWarmestMonth      | min. temp. of the warmest month                                                                                                                                                          | °C * 10    |
| monthCountByTemp10       | count of the number of months with mean temp greater than 10°C                                                                                                                           | months     |
| PETColdestQuarter        | mean monthly PET of coldest quarter                                                                                                                                                      | mm / month |
| PETDriestQuarter         | mean monthly PET of driest quarter                                                                                                                                                       | mm / month |
| PETseasonality           | monthly variability in potential evapotranspiration                                                                                                                                      | mm / month |
| PETWarmestQuarter        | mean monthly PET of warmest quarter                                                                                                                                                      | mm / month |
| PETWettestQuarter        | mean monthly PET of wettest quarter                                                                                                                                                      | mm / month |
| thermInd                 | compensated thermicity index: sum of mean annual temp., min. temp. of coldest month, max. temp. of the coldest month, x 10, with compensations for better comparability across the globe | °C         |

**Table S3.** Datasets used in this study

| Name                                                  | Data format | Source (Year)           |
|-------------------------------------------------------|-------------|-------------------------|
| Land cover data                                       | Vector      | MINAM (2015)            |
| WorldClim version 2.0 bioclimate dataset (current)    | Raster      | Fick and Hijmans (2017) |
| Global-Aridity and Global-PET                         | Raster      | CGIAR-CSI (2018)        |
| World Clim version 1.4 bioclimate dataset (2070)      | Raster      | Hijmans et al., (2005)  |
| National, regional and private protected area systems | Vector      | MINAM (2019)            |

**Table S4.** Classification model performance

|                                          | AUC*  |
|------------------------------------------|-------|
| Artificial Neural Networks               | 0.820 |
| Generalized Linear Models                | 0.851 |
| Boosted Regression Trees                 | 0.787 |
| Random Forests                           | 0.914 |
| Multivariate Adaptive Regression Splines | 0.887 |

\* Area under the curve of the receiver operating characteristic

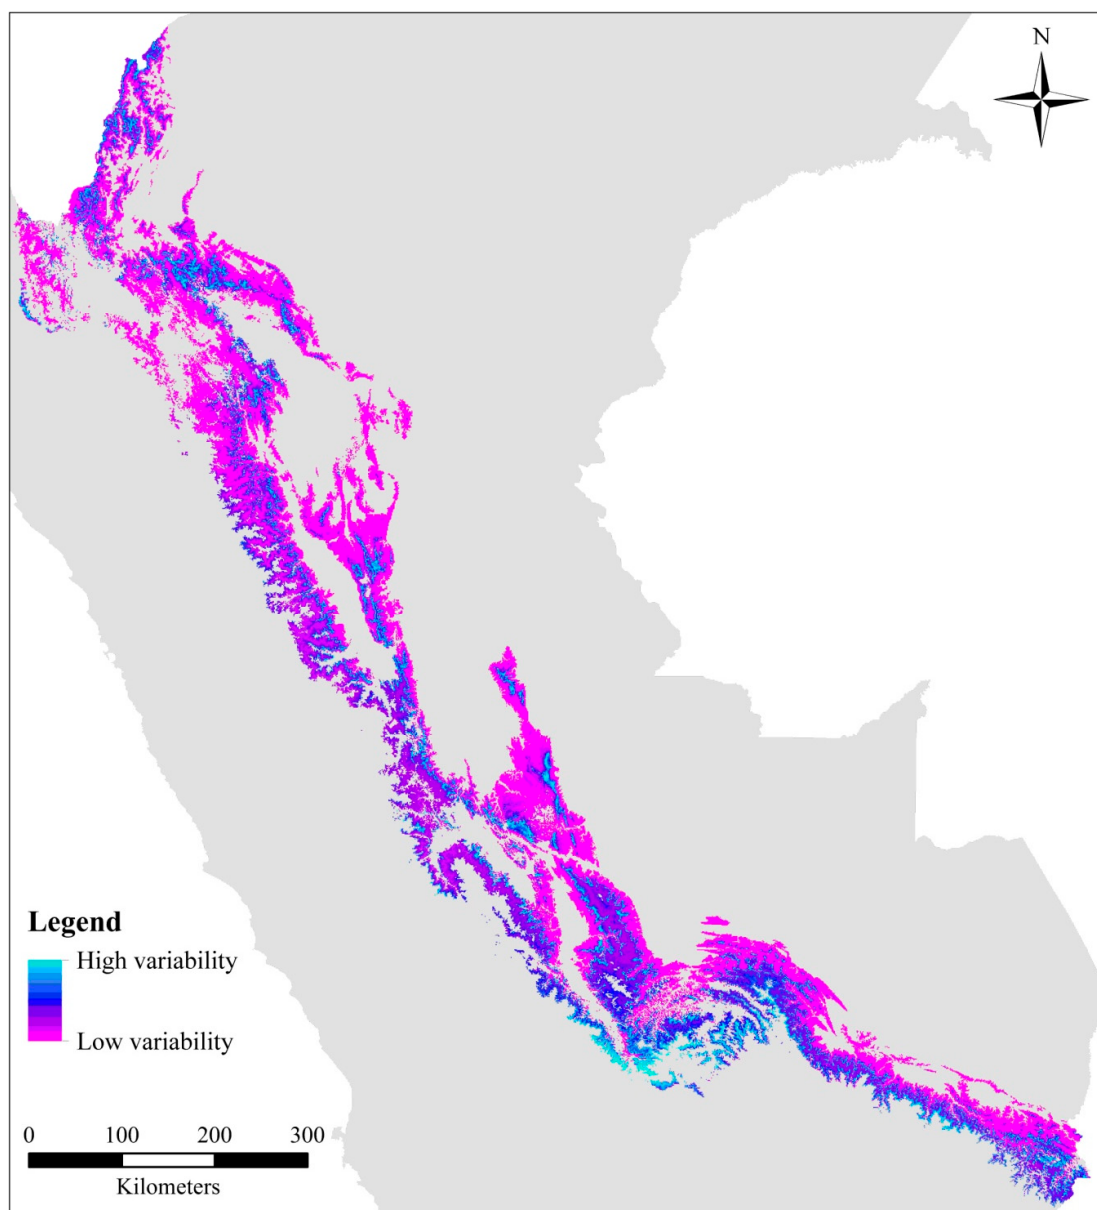**Figure S1.** Variability (as a measure of uncertainty) between the outcomes of different combinations of classification models and climate datasets used to generate montane forest projections.
